# Supplementary material
Source: MDPI journal article supplement (https://www.mdpi.com/2571-550X/4/2/14)
Supplement: s1 [file s1 › quaternary-1122435-supplementary.pdf]

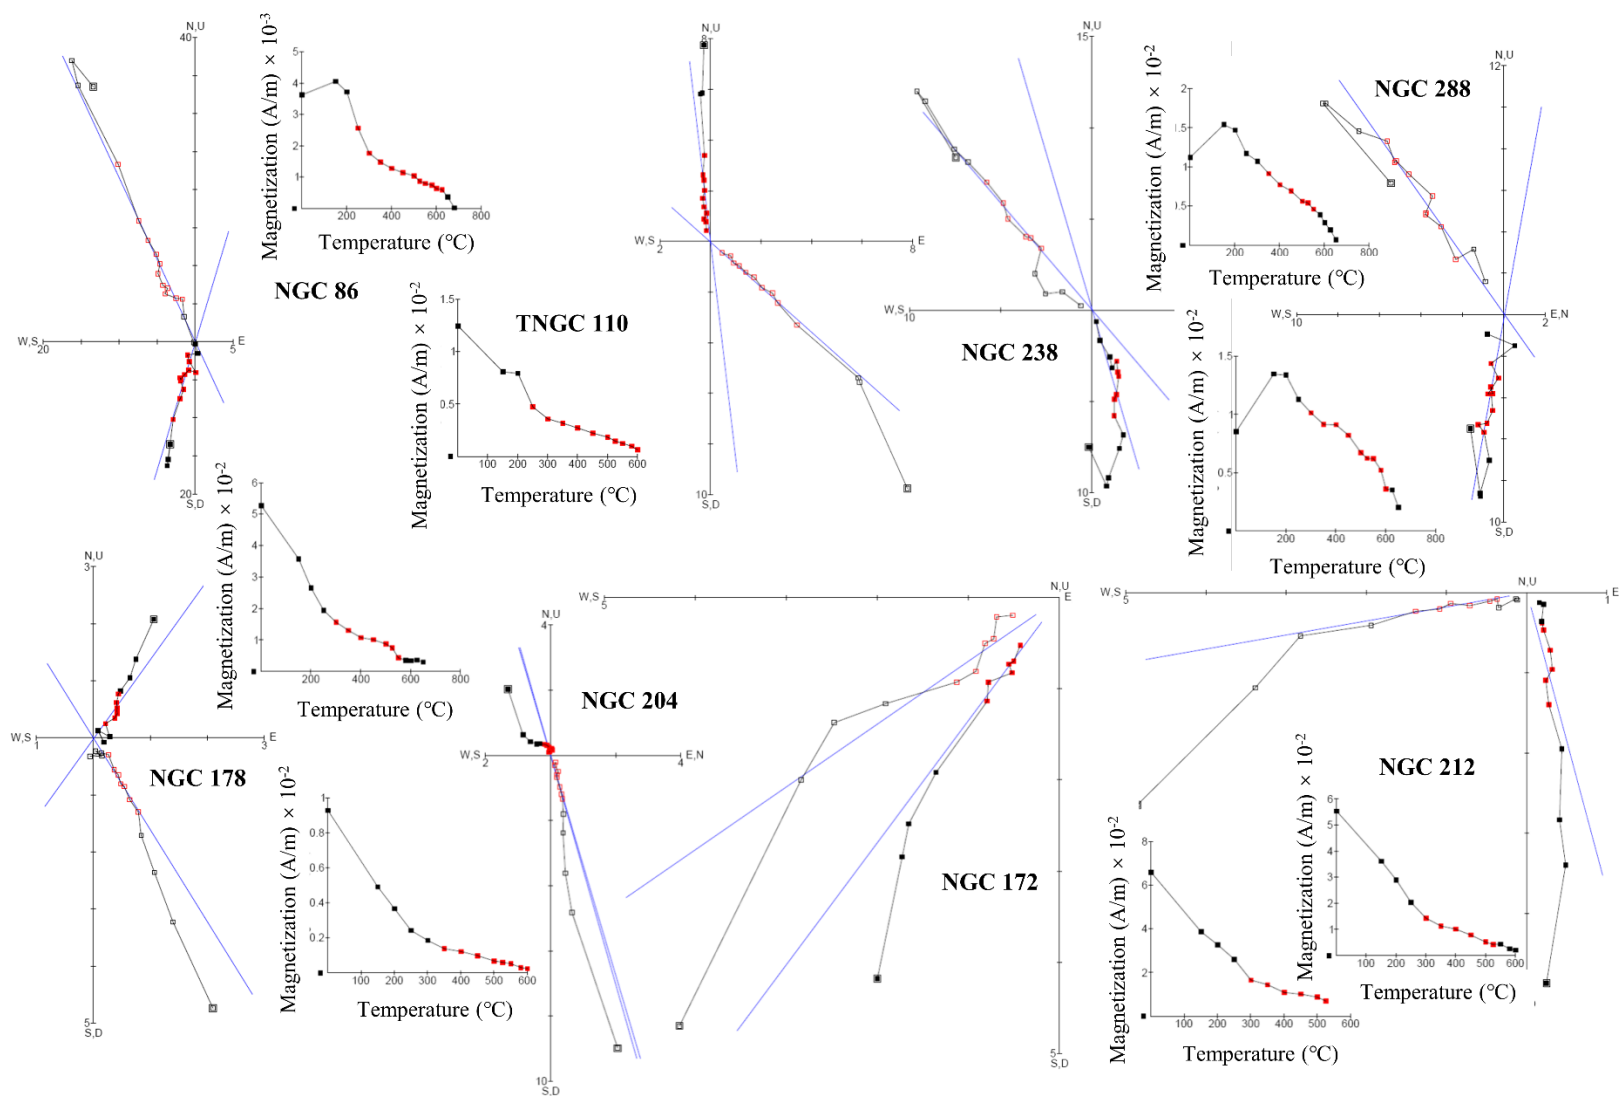

**Figure S1.** Results of the thermal demagnetization of the representative samples. NRM intensity decay curves and vector end-point diagrams. The open (solid) squares represent projections on the vertical (horizontal) plane, based on geographic coordinates.

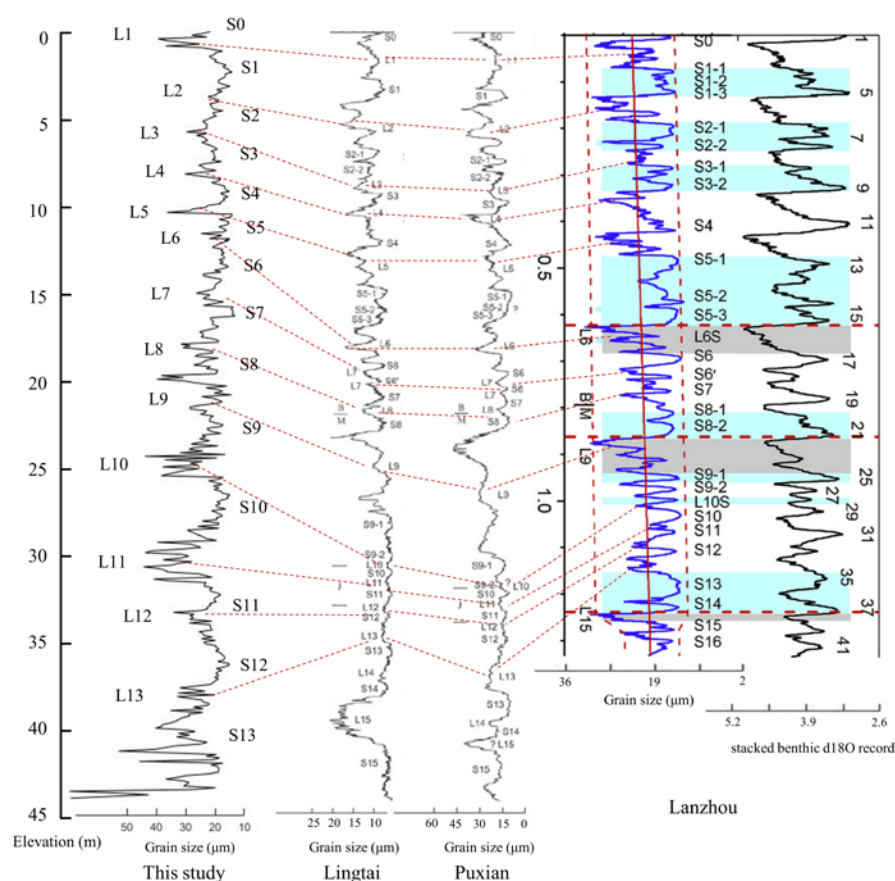

**Figure S2.** Comparison of the median grain-size record in the Wufo Basin (this study), Lanzhou site [42] and the central Chinese Loess Plateau (Lingtai and Puxian) [71]. The data of the stacked benthic  $d^{18}O$  record is from the reference [94].

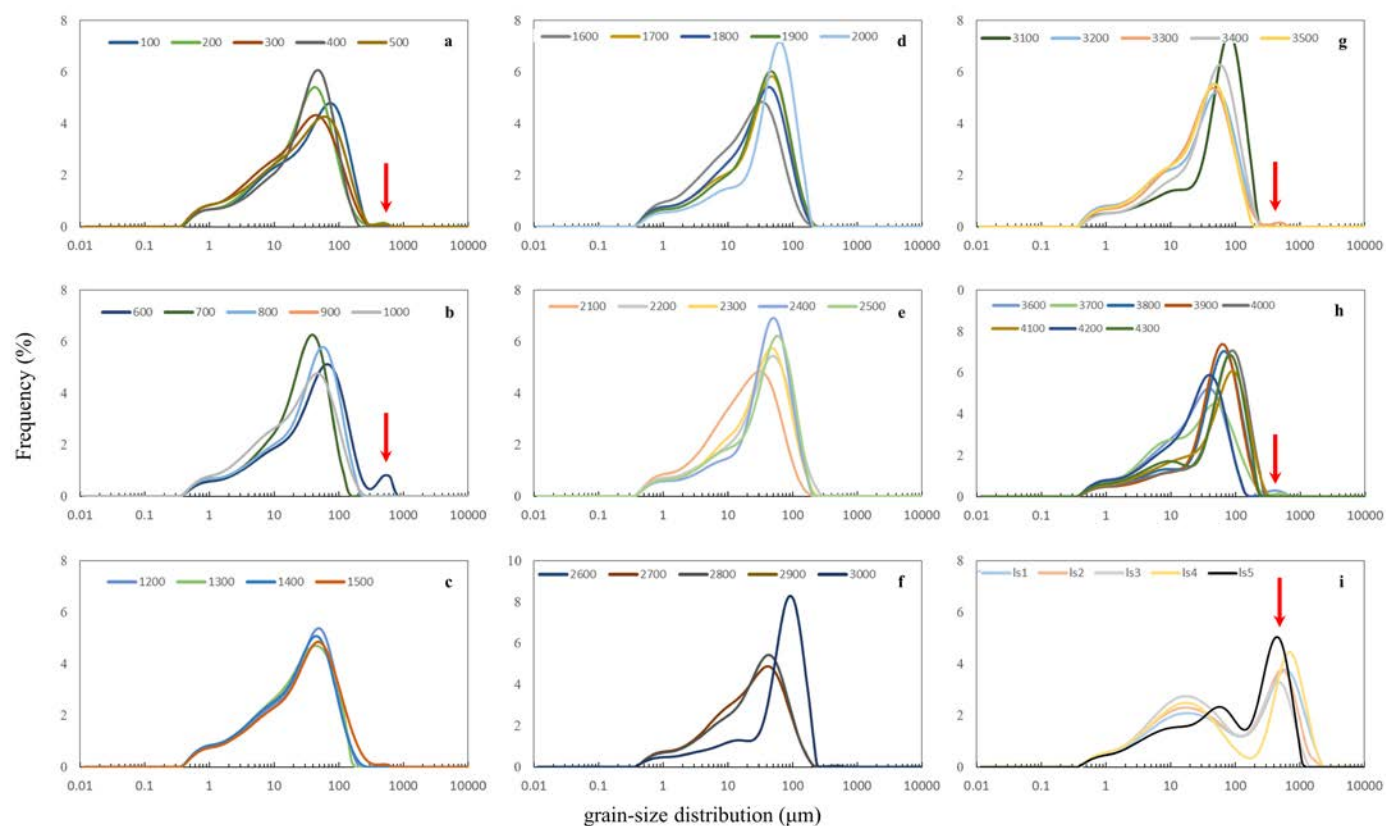

**Figure S3.** Grain-size distribution of loess overlaying terrace T8 with an interval of 100 cm (a-h), numbers in each figure represent the depth of each sample (cm). Figure (i) shows the floodplain deposit on T8 with an interval of 5-10 cm. Red arrows indicate the small peak (400  $\mu\text{m}$ ) in the grain-size distribution.

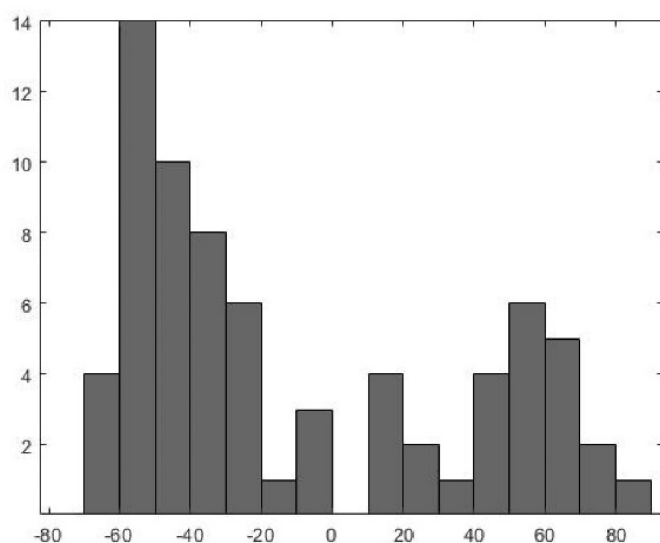

**Figure S4.** Histogram of the magnetic inclinations of terrace T8 in 10° bins.

#### Reference

94. Lisiecki, L.E. and Raymo, M.E. A Pliocene-Pleistocene stack of 57 globally distributed benthic  $\delta^{18}\text{O}$  records. *Paleoceanography* **2005**, *20*, PA1003.
